# Supplementary material for: An outer-sphere ligand for uranyl carbonate
Source: Royal Society of Chemistry journal article supplement (doi:10.1039/b309733a), 2004-01-01
Supplement: b309733a.doc [file b309733a.doc]

# Supporting Information

Spectroscopic characterization of per-6-deoxy-6-(ethylenediamino)--cyclodextrin

1H NMR (D2O, pD=8.0, Na2CO3, 600 MHz)  4.91 (br. s, 6H, H1), 3.79 (br. t, 12H, H3,H5), 3.49 (br. d, 6H, H2), 3.39 (br. t, 6H, H4), 2.95 (br. s, 6H, NHCH2CH2NH2), 2.85-2.63(m, 12H, H6), 2.57 (br. s, 6H, NHCH2CH2NH2), 2.50 (br. s, 12H, NHCH2CH2NH2)

13C NMR (D2O, 150 MHz)  104.2 (C1), 86.0 (C4), 75.8 (C3), 74.3 (C2), 73.3 (C5), 53.9 (-NHCH2CH2NH2), 51.9 (C6), 42.4 (-NHCH2CH2NH2) MS: (m/z) 1226 (MH+1), 613(MH2+2), 409 (MH3+3), 205 (MH6+6)

Homonuclear 1H COESY spectrum


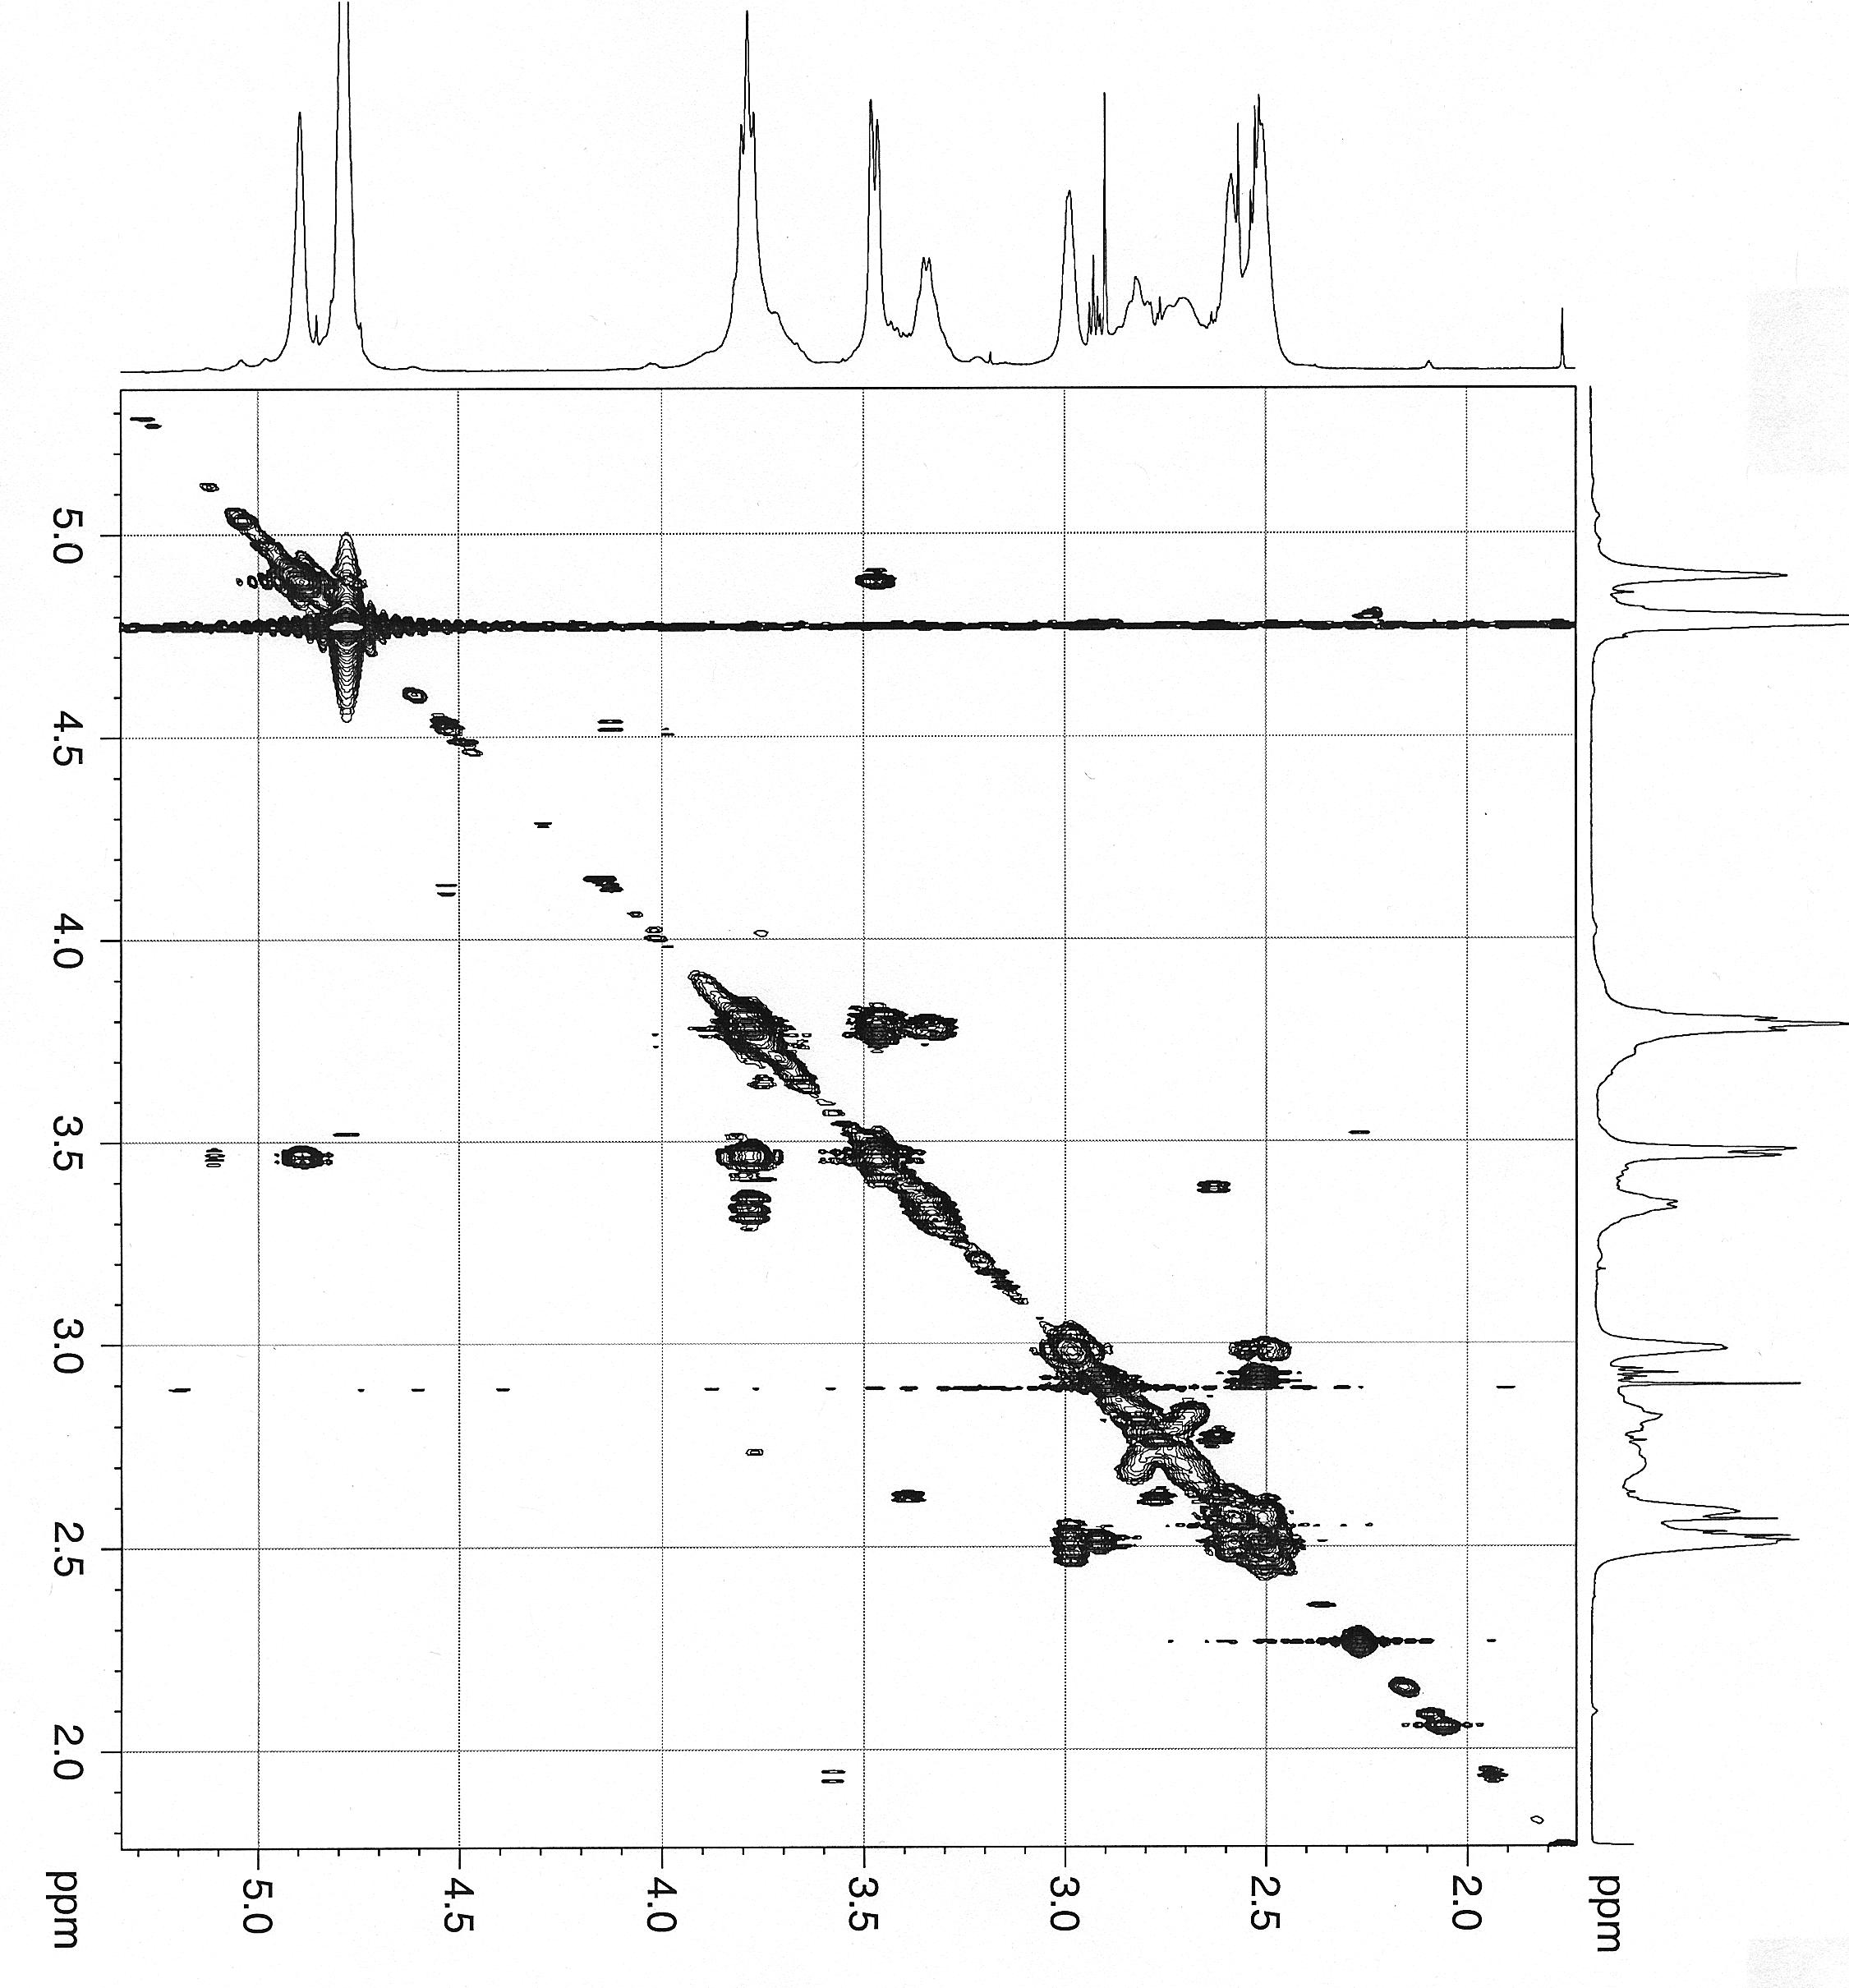


Heteronuclear HMBC spectrum


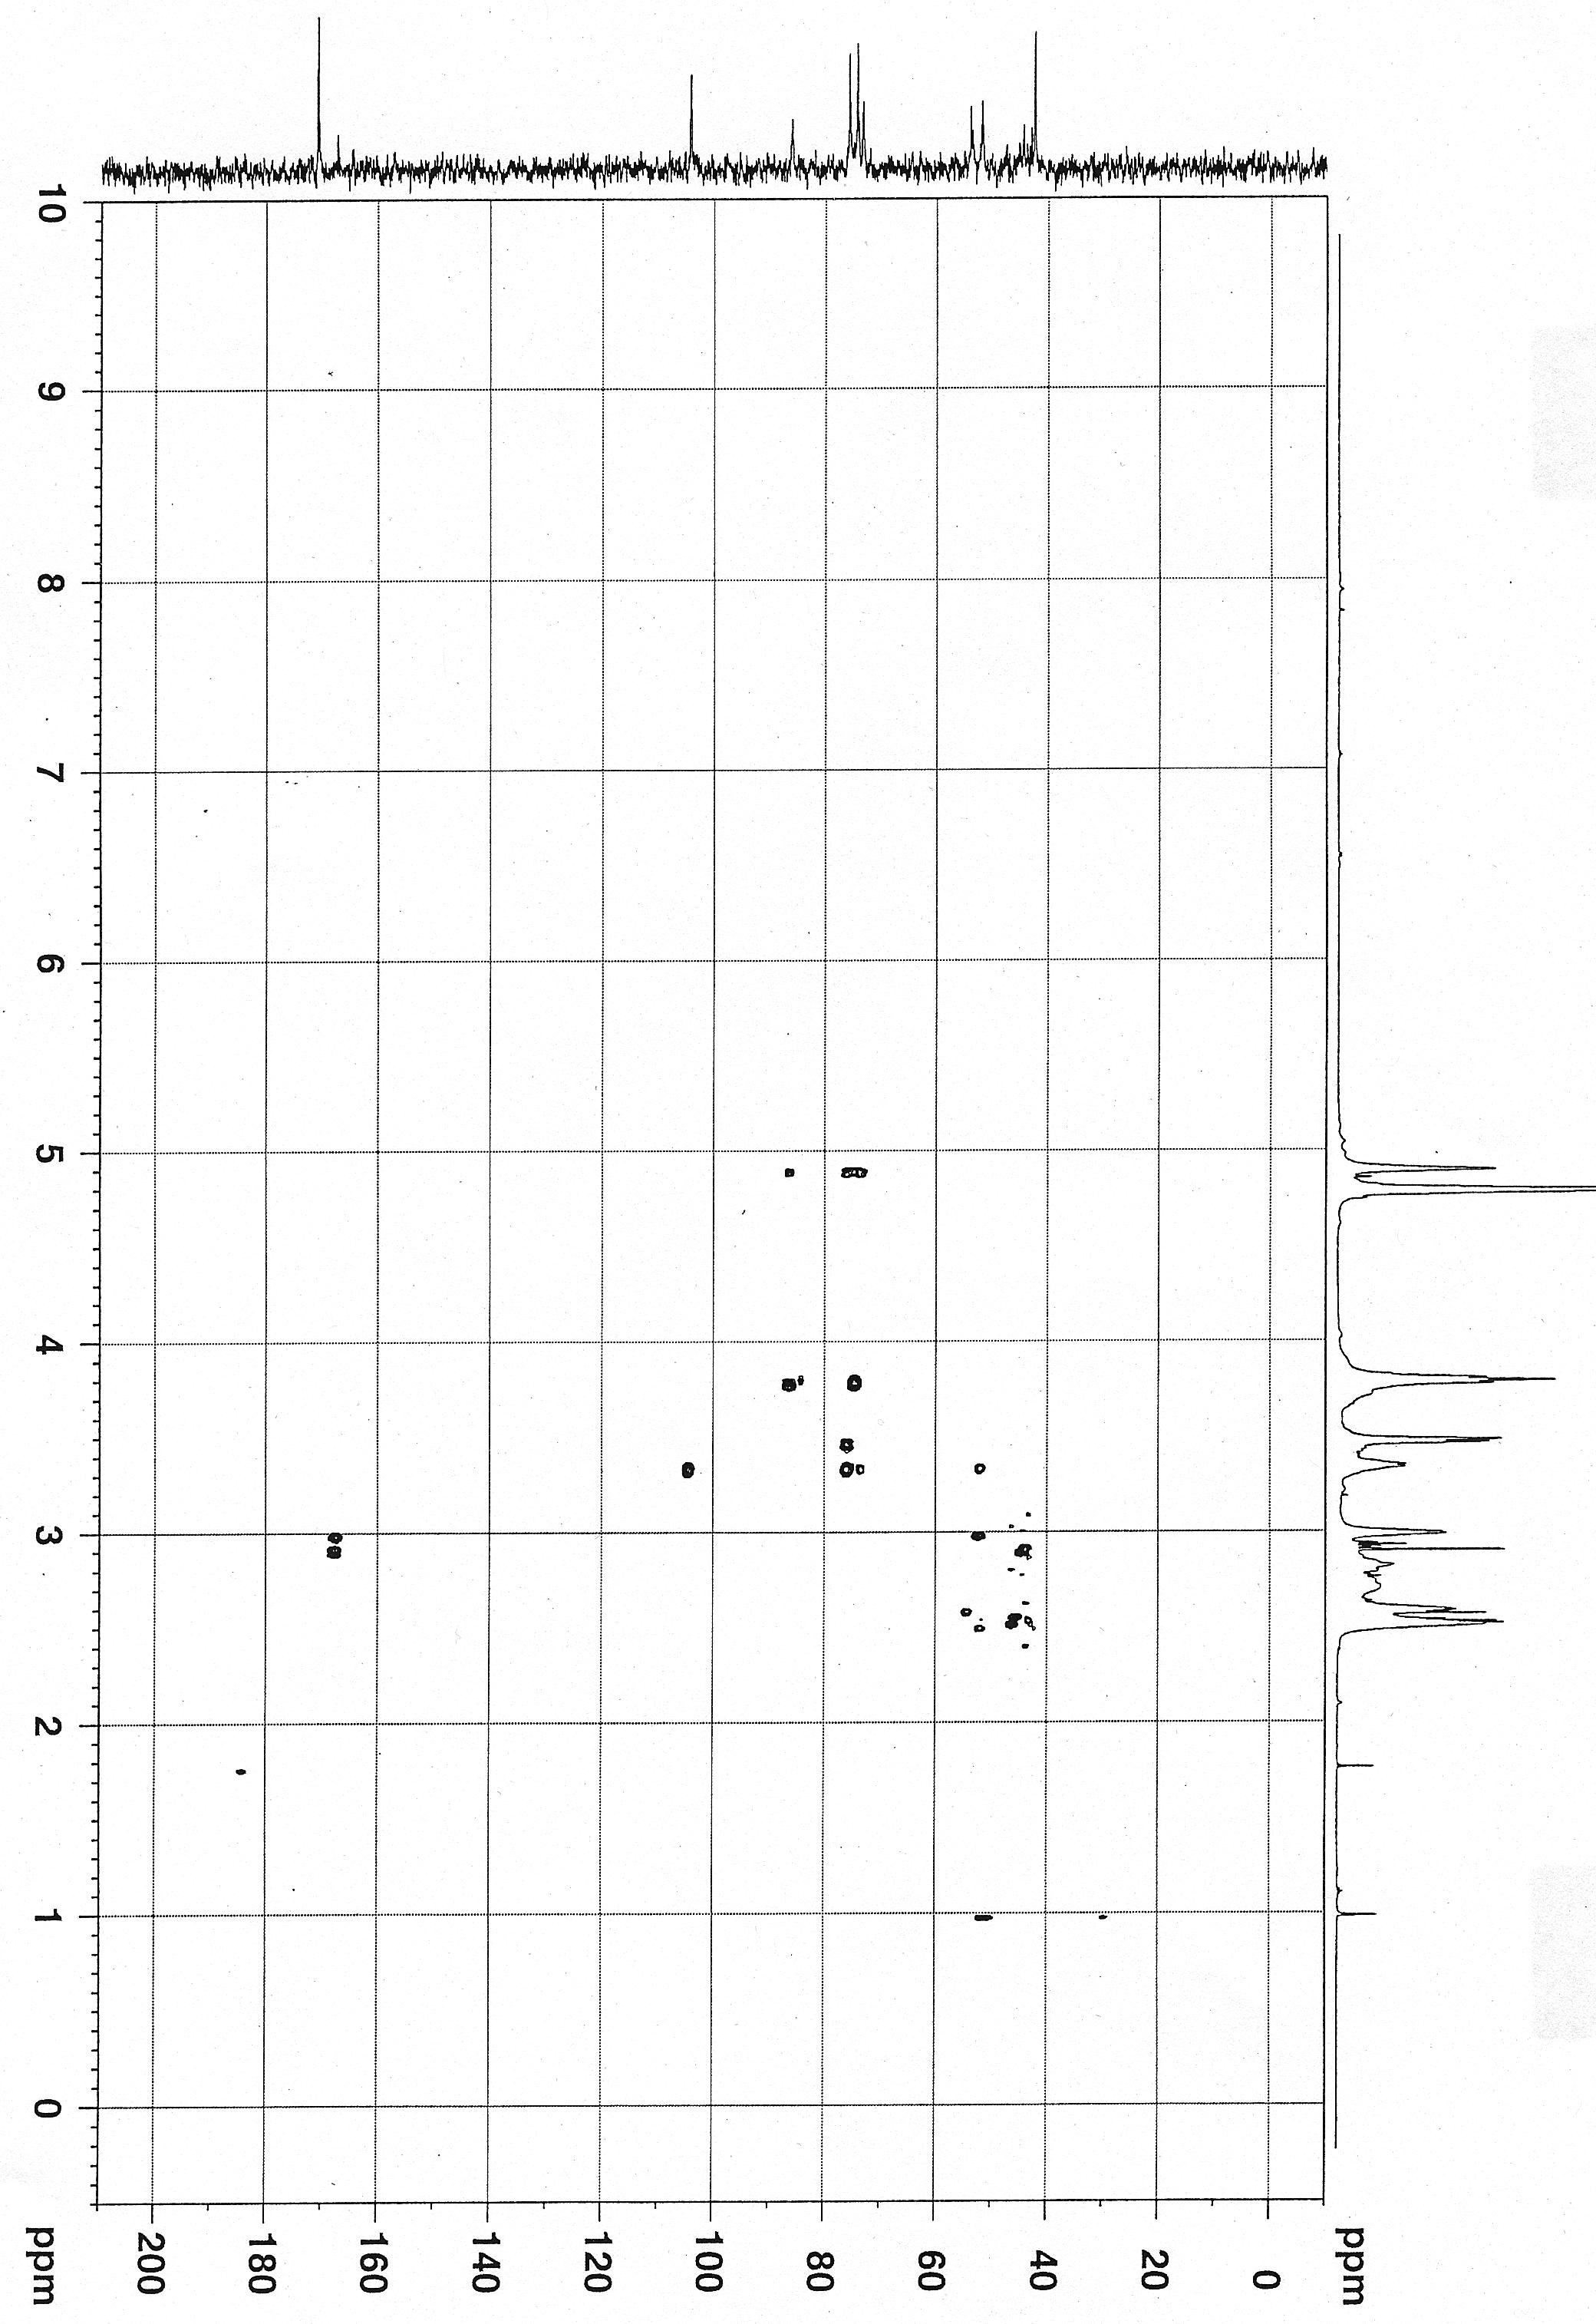


Heteronuclear HMQC spectrum


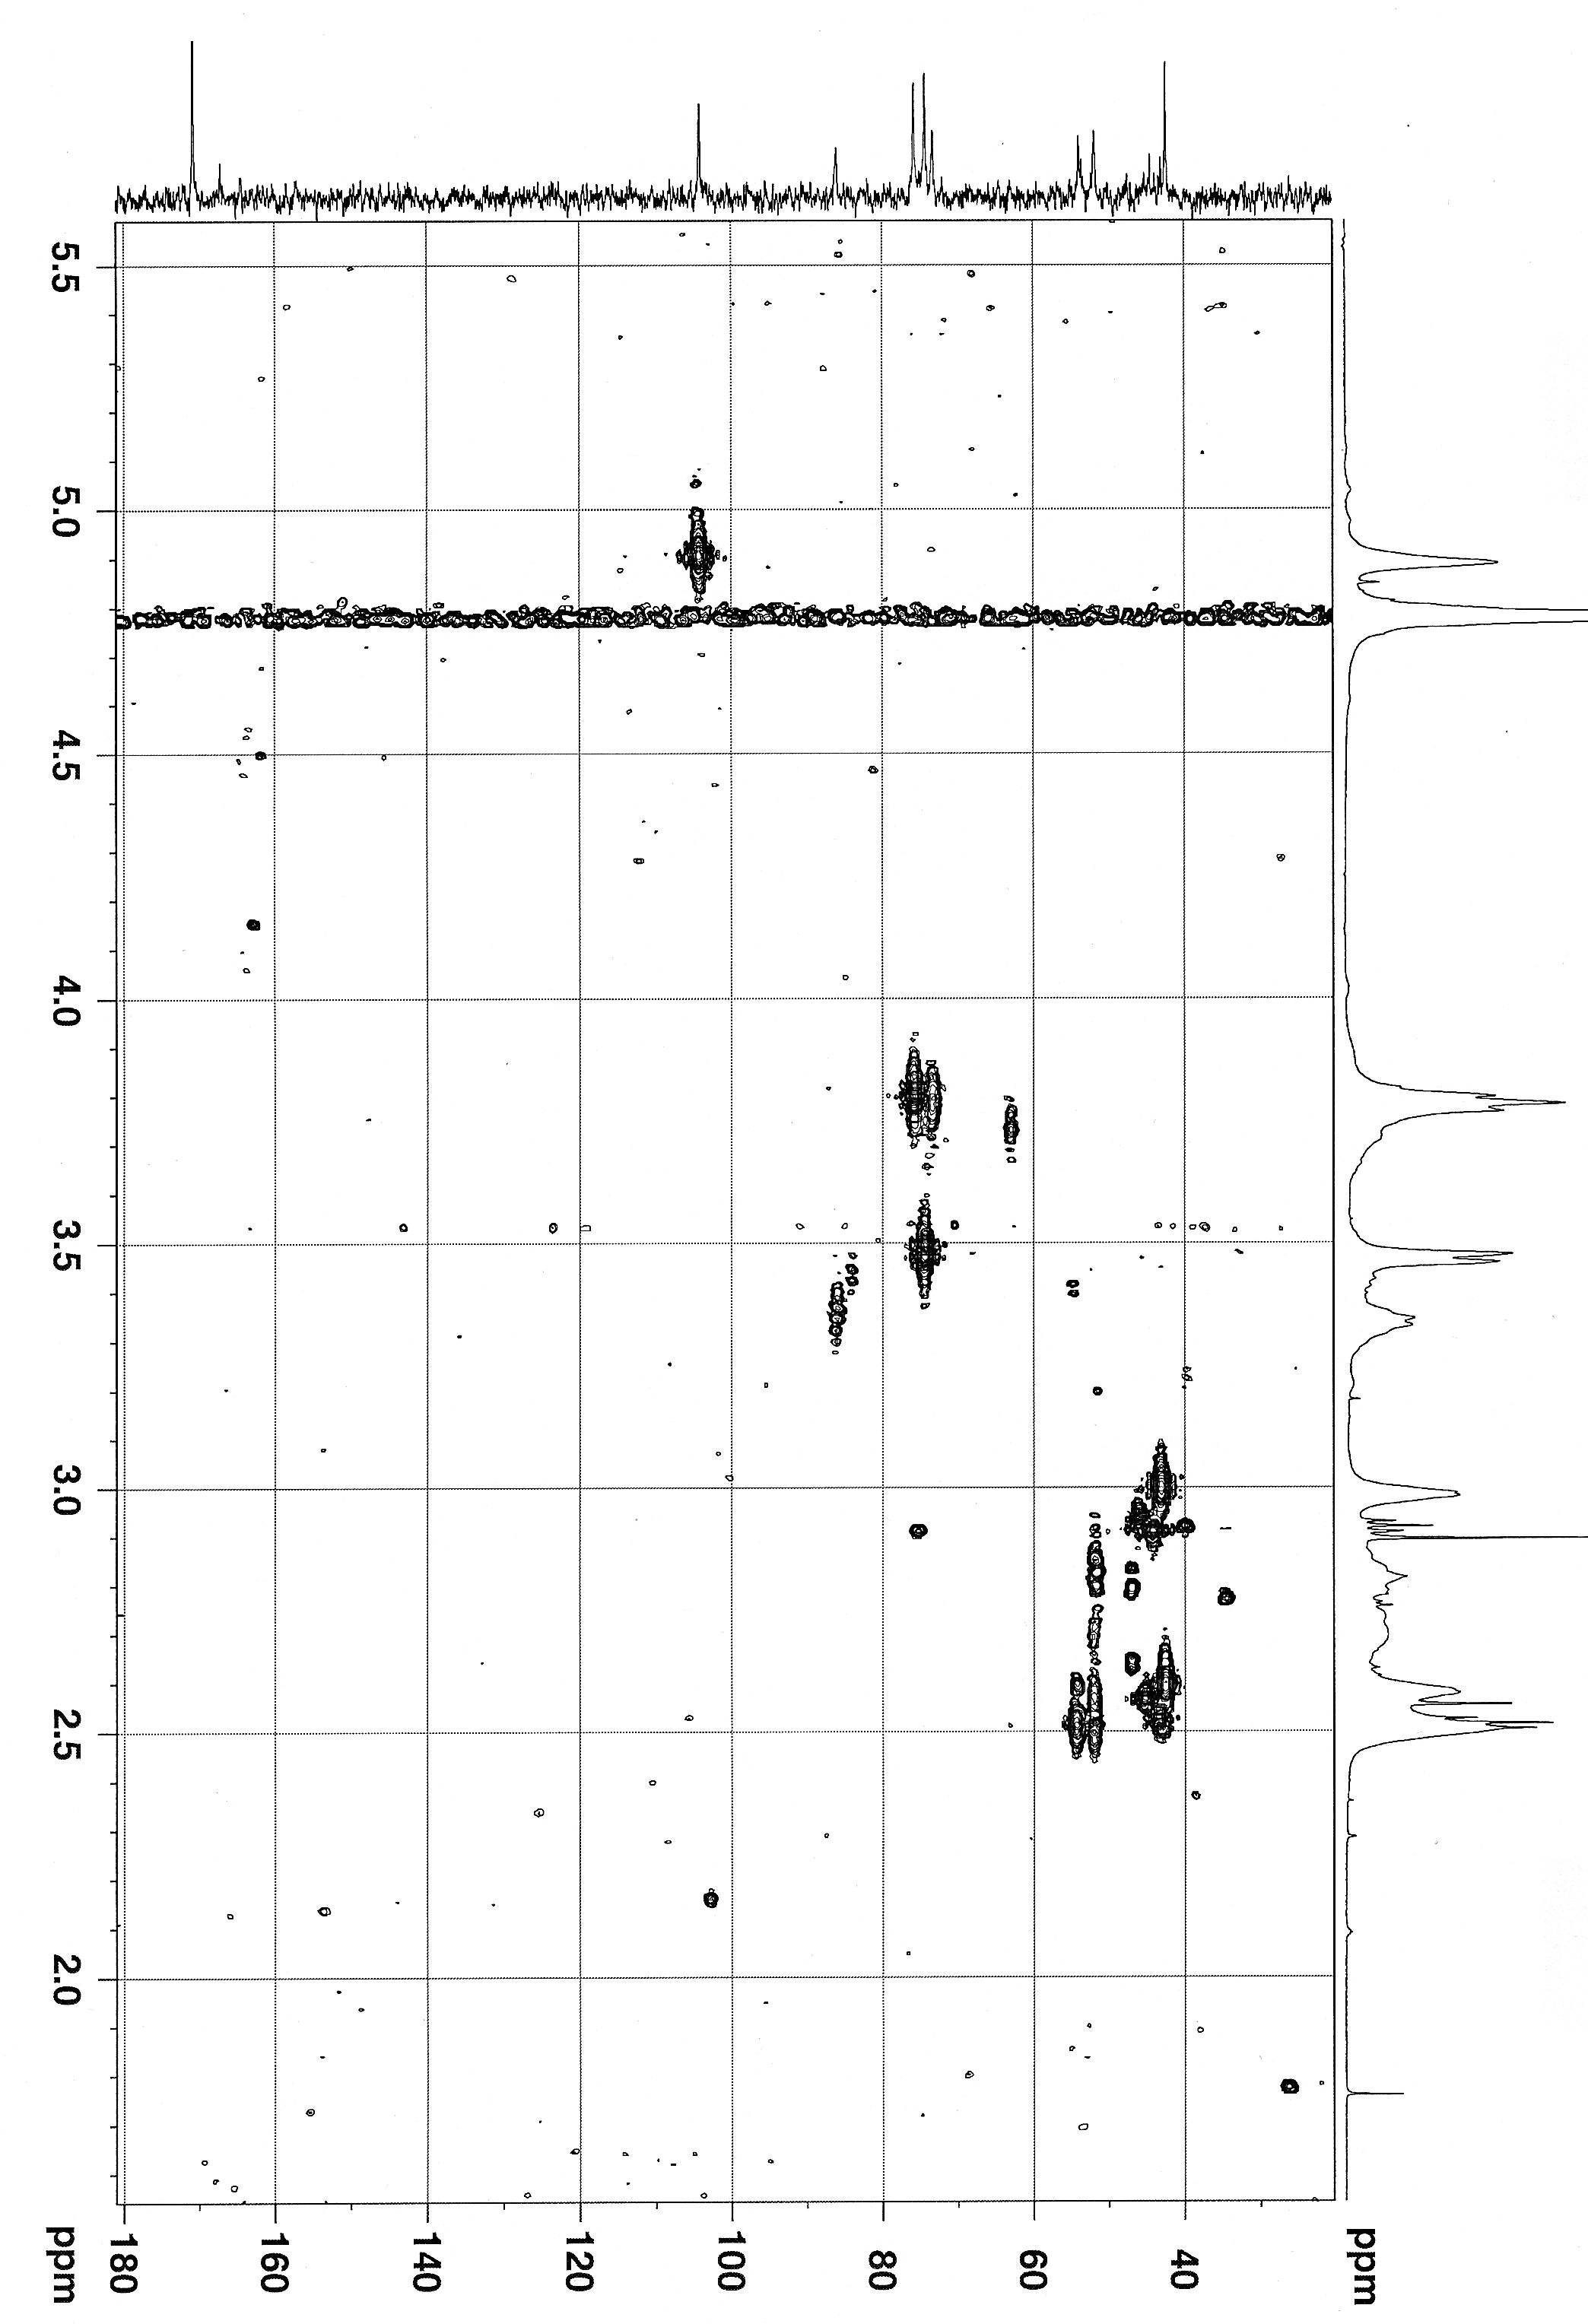


The titration of per-6-deoxy-6-(ethylenediamino)--cyclodextrin and uranyl carbonate followed by 1H NMR. A fit of the H1 proton shifts yield a 1:1 binding isotherm, K = 253 (20) given in the figure below as do the ethylene diamine proton signals given in the article..

Species concentrations/mol dm-3

Point -T[Ho] T[G] F[Ho] F[G] [H-G Complex]

1 -1.355e-03 4.000e-04 1.2573e-03 3.0230e-04 9.7697e-05

2 -1.350e-03 5.000e-04 1.2299e-03 3.7990e-04 1.2010e-04

3 -1.310e-03 1.000e-03 1.0910e-03 7.8099e-04 2.1901e-04

4 -1.328e-03 1.400e-03 1.0340e-03 1.1060e-03 2.9397e-04

5 -1.321e-03 1.500e-03 1.0115e-03 1.1905e-03 3.0952e-04

6 -1.313e-03 1.600e-03 9.8876e-04 1.2758e-03 3.2424e-04

7 -1.305e-03 1.800e-03 9.5133e-04 1.4463e-03 3.5367e-04

8 -1.298e-03 2.000e-03 9.1663e-04 1.6186e-03 3.8137e-04

9 -1.290e-03 2.500e-03 8.4423e-04 2.0542e-03 4.4577e-04

10 -1.283e-03 5.000e-03 6.0760e-04 4.3246e-03 6.7540e-04

11 -1.276e-03 1.000e-02 3.8197e-04 9.1060e-03 8.9403e-04

12 -1.271e-03 1.500e-02 2.7631e-04 1.4005e-02 9.9469e-04

Ho= per-6-deoxy-6-(ethylenediamino)--cyclodextrin

G= uranyl carbonate

Calculated species distributions

Species distributions were calculated using the formation constants from ref.7. A model was constructed using the natural concentration of Uranyl in seawater over a wide pH range. The carbonate species is clearly dominant over a wide range of pH values in the absence of added outer-sphere ligand. In the presence of per-6-deoxy-6-(ethylenediamino)--cyclodextrin as an outer-sphere ligand, approximately 75% of the uranyl carbonate is complexed over the pH range of 7 to 9. Several approximations are made in this model. The protonation behavior of the amino-cyclodextrin was not included in the model. Deprotonation of the amines will start to be significant above pH 9, leading to substantially decreased interaction between the ligand and the metal complex. The ligand was allowed to complex only uranyl tris-carbonate, all other species have no interaction with the ligand. This approximation is probably valid for the anions, Cl- and SO42-, but may be significant for various mixed ligand complexes of the uranyl ion. No anions other than OH-, Cl- and SO42-are included in the model. Finally, no solids are included in the speciation predictions. Formation of solids will perturb the equilibrium concentrations of the species in solution.
